# Supplementary material for: Process Evaluation of a Randomised Controlled Trial for TeleClinical Care, a Smartphone-App Based Model of Care
Source: PubMed Central journal article supplement (PMC8862755; doi:10.3389/fmed.2021.780882), 2022-02-08
Supplement: Data_Sheet_2.pdf [file Data_Sheet_2.pdf]

# TeleClinical Care

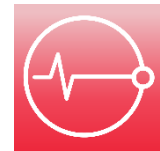

## Site Setup Form

Site Name: \_\_\_\_\_

All aspects need to be confirmed as 'Yes' prior to recruitment commencing at the site.

**Site Pre-requisites:** The site must meet all of the following criteria.

| Components                                                 | Yes | No |
|------------------------------------------------------------|-----|----|
| The hospital provides an inpatient cardiology service      |     |    |
| A heart failure outreach program is affiliated to the site |     |    |
| Cardiac rehabilitation is offered by the site              |     |    |
| Ethics approval has been secured for the site              |     |    |
| Governance approval has been secured for the site          |     |    |

**Site Educational Components:** All of the following groups should have been introduced to TCC either by way of a presentation at a departmental meeting, in-service or a dedication discussion.

| Components                                                                             | Yes | No |
|----------------------------------------------------------------------------------------|-----|----|
| TCC site team members                                                                  |     |    |
| Hospital cardiologists                                                                 |     |    |
| CCU and cardiology ward (including the nurse unit managers of CCU and cardiology ward) |     |    |
| Cardiology junior medial staff (ATs, BPTs and JMOs)                                    |     |    |
| Cardiac rehabilitation staff                                                           |     |    |
| Heart failure outreach staff                                                           |     |    |

**TCC Team Member:** Each site must have at least one individual who will be committed with the task of enrolling and 'onboarding' patients to the TCC system.

| Components                                                | Yes | No |
|-----------------------------------------------------------|-----|----|
| Available at least for 15 hours per week                  |     |    |
| Has a medical or nursing background                       |     |    |
| Access provided for REDCap                                |     |    |
| Access provided for KIOLA                                 |     |    |
| Access provided for EMR and ability to add-on blood tests |     |    |
| Access provided for echocardiography results              |     |    |
| Access provided for angiography (cath lab) results        |     |    |

# TeleClinical Care



## Site Setup Form

Site Name: \_\_\_\_\_

### Training and Assistance for TCC Team Member

| Components                                                       | Yes | No |
|------------------------------------------------------------------|-----|----|
| Team member has received the peripherals                         |     |    |
| Team member has observed the enrolment of 2 patients             |     |    |
| Team member has recruited two patients under supervision         |     |    |
| Team member has a copy of the <i>Operations Manual</i>           |     |    |
| Team member is confident in assessing phone compatibility        |     |    |
| Team member is confident in connecting peripheral devices        |     |    |
| Team member has been given contact details for technical support |     |    |
| Team member has been given contact details for research support  |     |    |

**Office Space:** A lockable office space is required for TCC.

| Components                                                                     | Yes | No |
|--------------------------------------------------------------------------------|-----|----|
| A lockable office is available                                                 |     |    |
| The office has enough room for storage of patient files and peripheral devices |     |    |
| Computer for TCC use                                                           |     |    |
| Printer for TCC use                                                            |     |    |
| An iPad or mobile phone is provided for formatting of Mi Bands                 |     |    |

**Equipment:** The following items are required for enrolment

| Components                                                             | Yes | No |
|------------------------------------------------------------------------|-----|----|
| Sufficient scales, BP machines and Mi Bands to meet recruitment target |     |    |
| A wall-mounted stadiometer to measure height                           |     |    |
| A 'master' set of scales and BP machine                                |     |    |
| A measuring tape for waist circumference                               |     |    |
| A six-minute walk test track with markers                              |     |    |

Assessor Name: \_\_\_\_\_

Assessor Signature: \_\_\_\_\_
